# Supplementary material for: Long working hours in the healthcare system of the Belo Horizonte municipality, Brazil: a population-based cross-sectional survey
Source: Springer Nature journal article supplement (doi:10.1186/s12960-017-0203-6), 2017-04-21
Supplement: MOESM3 [file 12239780]

**Parecer nº. ETIC 542/07**

**Interessado(a): Profa. Ada Ávila Assunção**  
**Departamento de Medicina Preventiva e Social**  
**Faculdade de Medicina-UFMG**

**DECISÃO**

O Comitê de Ética em Pesquisa da UFMG – COEP aprovou, no dia 28 de novembro de 2007, o projeto de pesquisa intitulado "Condições de emprego, condições de trabalho e saúde dos trabalhadores da saúde" bem como o Termo de Consentimento Livre e Esclarecido.

O relatório final ou parcial deverá ser encaminhado ao COEP um ano após o início do projeto.

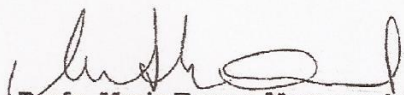

**Profa. Maria Teresa Marques Amaral**  
**Coordenadora do COEP-UFMG**
