# Supplementary material for: Long working hours in the healthcare system of the Belo Horizonte municipality, Brazil: a population-based cross-sectional survey
Source: Springer Nature journal article supplement (doi:10.1186/s12960-017-0203-6), 2017-04-21
Supplement: MOESM4 [file 12239780]

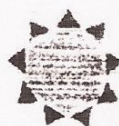

**PREFEITURA BH**

**COMITÊ DE ÉTICA EM PESQUISA-SECRETARIA MUNICIPAL DE  
SAÚDE DE BELO HORIZONTE (CEP-SMSA/PBH)**

Avaliação de projeto de pesquisa - **Protocolo 054/2006**

**Projeto:** Condições de Emprego, Condições de Trabalho e Saúde dos Trabalhadores de Saúde"

**Pesquisadora:** Maria Cristina Ramos de Vasconcelos

**Pesquisador Responsável**

- 1) Ada Avila Assunção (coordenação)
- 2) Soraya Almeida Belisário (coordenação)
- 3) Luciana Souza d'Avila (Bolsista do Projeto)
- 4) Maria Cristina Ramos de Vasconcelos Coelho (Mestranda / Programa de Pós-graduação em Saúde Pública/UFMG)
- 5) Vivian Patricia Andrade de Souza (Bolsista do Projeto)
- 6) Juliana da Costa Martins

O projeto acima referido cumpriu os requisitos da resolução 196/96 da CONEP, tendo sido aprovado na reunião do Comitê de Ética em Pesquisa da Secretaria Municipal de Saúde de Belo Horizonte.

O relatório final ou parcial deverá ser encaminhado ao CEP um ano após início do projeto ou ao final deste, se em prazo inferior a um ano

  
Celeste de Souza Rodrigues  
Coordenadora do CEP-SMSA/PBH

Belo Horizonte, 01 de dezembro de 2006
